# Supplementary material
Source: Springer Nature journal article supplement (https://www.springermedizin.de/resource/supplementary/13229_2013_105_MOESM5_ESM.pdf/9676270)

# Supplementary Figure 3

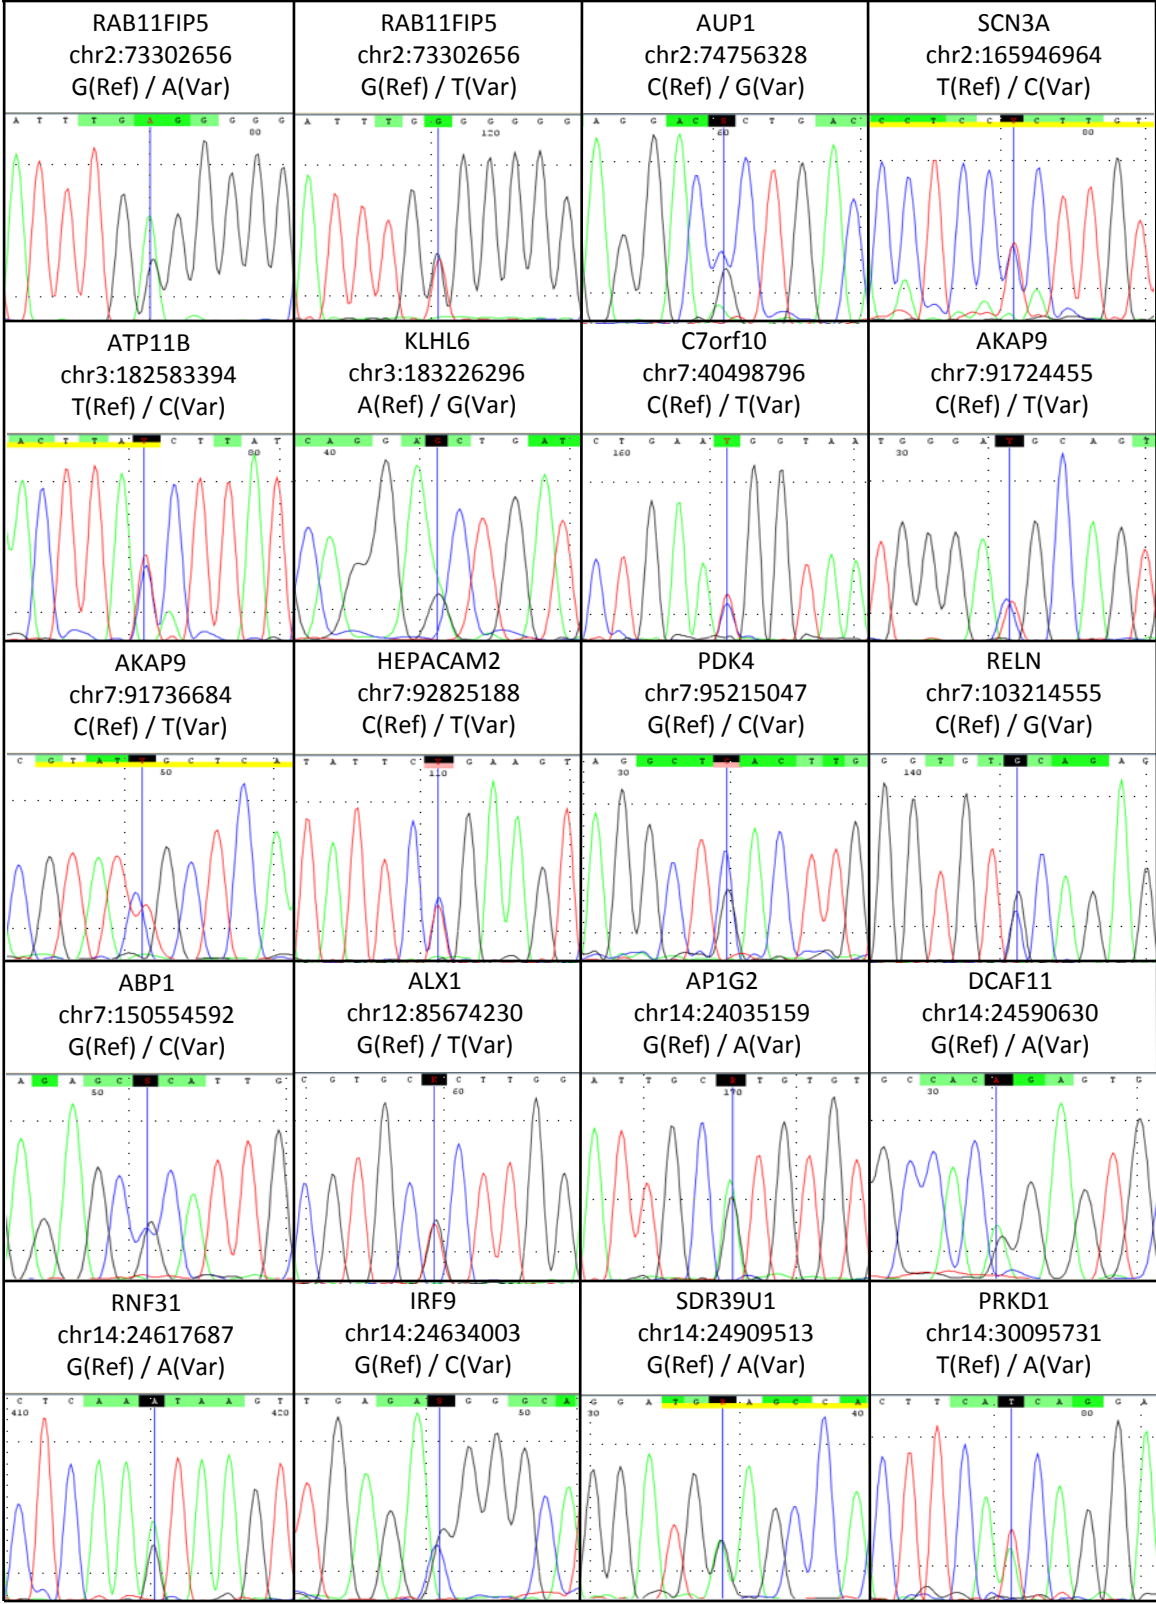

Supplement: MOESM5 [file 9676270]
